# Supplementary material for: Bryophyte Species Richness on Retention Aspens Recovers in Time but Community Structure Does Not
Source: PLoS One. 2014 Apr 7;9(4):e93786. doi: 10.1371/journal.pone.0093786 (PMC3978069; doi:10.1371/journal.pone.0093786)
Supplement: File S1 — Site information and original data. (XLSX) [file pone.0093786.s001.xlsx]

## Sheet: READ ME
The Site information -sheet provides data on the study sites.
Each row (2 to 28) presents one study site.
The columns (A to F) include the following information:
Site type separates retention sites from conservation sites.
Site ID is an identifier of the site.
Location is the commune where the site is located.
Stand age is the time since logging for retentions sites or the approximate age of the dominant tree cohort for conservations sites.
Size (ha) gives the size of the stand (area of similar tree structure) in hectares.
Forest type is classified according to Cajander 1926 (see article).
The Original data -sheet provides the dataset that was used for analyses.
Each row (2 to 205) presents one study aspen.
The columns (A to BM) include the following information:
Site ID is an identifier of the site where the aspen was located.
Site type 1 refers to retention sites and 2 refers to conservation sites.
Time since logging is the number of years that had passed between the logging of the site and the data collection. It is relevant only for the retention sites.
Stand age is the estimated age of the dominating tree cohort. It is relevant only for the conservation sites.
Diameter is the diameter at breast height for the study aspen.
The species columns (from Ambl serp to Sciu star) give the abundance (in cm²) of each of the species on the study aspens. Please see Supporting Information SI 3 for the complete scientific names and authors.

## Sheet: Site information
Site type	Site ID	Location	Stand age (years)	Size (ha)	Forest type
retention	1	Toivakka	5	2	Myrtillus
retention	2	Toivakka	12	9	Myrtillus
retention	3	Toivakka	11	9	Myrtillus
retention	4	Toivakka	2	3	Oxalis-Myrtillus
retention	5	Toivakka	16	1	Oxalis-Myrtillus
retention	6	Toivakka	8	19	Myrtillus
retention	7	Joutsa	9	4	Myrtillus
retention	8	Kuhmoinen	2	1	Myrtillus
retention	9	Kuhmoinen	27	20	Myrtillus
retention	10	Kuhmoinen	30	7	Myrtillus
retention	11	Jyväskylä	2	5	Myrtillus
retention	12	Jämsä	8	9	Myrtillus
retention	13	Jämsä	3	6	Oxalis-Myrtillus
retention	14	Jämsä	6	20	Myrtillus
conservation	101	Toivakka	95	26	Oxalis-Myrtillus
conservation	102	Toivakka	107	15	Myrtillus
conservation	103	Toivakka	106	62	Myrtillus
conservation	104	Toivakka	96	14	Oxalis-Myrtillus
conservation	105	Toivakka	110	3	Oxalis-Myrtillus
conservation	106	Toivakka	120	17	Myrtillus
conservation	107	Joutsa	90	6	Myrtillus
conservation	108	Kuhmoinen	149	3	Myrtillus
conservation	109	Kuhmoinen	127	72	Myrtillus
conservation	110	Kuhmoinen	175	18	Oxalis-Myrtillus
conservation	111	Jyväskylä	87	29	Myrtillus
conservation	112	Jämsä	120	21	Myrtillus
conservation	113	Jämsä	113	7	Myrtillus
conservation	114	Muurame	150	75	Oxalis-Myrtillus

## Sheet: Original data
Site ID	Site type	Time since logging	Stand age	Diameter	Ambl serp	Ambl subt	Barb barb	Barb hatc	Blep tric	Braa velu	Brau eryt	Brau sale	Bryu mora	Call cusp	Caly inte	Camp chrys	Camp somm	Cera purp	Clim dend	Dicr fusc	Dicr mont	Dicr poly	Dicr scop	Eurh pulc	Fiss osmu	Hete dimo	Homa tric	Hylo splen	Hypn ando	Hypn cupr	Hypn pall	Isop pulc	Lopc hete	Lopc mino	Lopz obtu	Lopz long	Metz furc	Mniu stel	Neck penn	Orth gymn	Orth obtu	Orth spec	Para long	Plac aspl	Plac pore	Plam cusp	Plat curv	Plat dent	Plat laet
2	1	12		41.062							25	6.8											38					20								2					0.1	22.9
2	1	12		30.8761																			101					68.75														15
2	1	12		49.9747								734.5					66	6	15					60				10
2	1	12		58.2507								24.6																		34												0.5				88.4
2	1	12		22.2817																			6					344														2				87.5
2	1	12		15.9155																			16					147
2	1	12		15.2789								17
2	1	12		51.5662						100.8		99.2											7					1357		3											2.1	2.4
2	1	12		28.0113																			30																			2.5				184.5		5
2	1	12		31.5127																								290													24	24				322.4
5	1	16		43.2901								186.6					36						8										3									21
5	1	16		13.0507																													17.2								74	1				4
5	1	16		40.7437								106.16					245.7						15																		6	2				204.8
5	1	16		24.5099								8.4											8					8													0.5					636
5	1	16		13.6873							6	212.6	3															400					8								1					6		16.5
5	1	16		27.0563			77					8.32											28.8
5	1	16		64.2986	1						2.5	552.9	78				656											20		12																1591
5	1	16		64.6169	1281.15							884.15											4					516						4							81	17				258.4
6	1	8		31.831			2					1.5											42					30																				3.5
6	1	8		19.4169								10					7																									1
6	1	8		10.8225								18.6																16					2
6	1	8		32.7859								57.5						6.9																							6	1
6	1	8		22.9183								172.5	28				67.5						60				22														1					61
6	1	8		26.4197								8																18							1
3	1	11		33.7408																								304													0.5					227
3	1	11		20.3718								549
3	1	11		15.5972								4.8					4.875						5
3	1	11		14.9606								62.8																					1													2
3	1	11		21.3268								199.2					3.3																									3.5
3	1	11		39.4704						46		29					185.2						40					10														0.5
3	1	11		49.0197							5.4																														4					1010
3	1	11		42.0169						34	208.8	104.4											8																		35	11
4	1	2		34.0592	30							1											2					10		1											1	17				683.5
4	1	2		25.1465																								1500														5				487.2
4	1	2		28.9662																								114		7											17.5	16.5				1197
4	1	2		12.0958	0.5							78											9
4	1	2		36.6056				5			100	7.5	8																	7.5											0.4	2.6				10
4	1	2		14.3239								54.52											2					10																		22
7	1	9		23.5549								197						12
7	1	9		36.2873								4.4											15					1020
7	1	9		14.0056								32					0.9											3					11									3
7	1	9		16.8704								50.4	20										132					546
7	1	9		31.1944								536						6					52
7	1	9		28.6479	3.6								161					90					15					10					9															3
11	1	2		36.9239	7.2					0.8		34					79.4																							6	19					17
11	1	2		38.1972	6					33													33					80													6.4	7.6
11	1	2		42.0169																								65													14	5
11	1	2		42.0169	31.2							8											6					240														1				3
11	1	2		27.693								24					7						15					300
11	1	2		26.1014						144																		800													1.8	17.2
11	1	2		16.8704								43.8											4					310													0.3	7.7
11	1	2		19.4169								7																550														0.5
14	1	6		33.1042						21.6		45.5																520												0.75
14	1	6		34.0592								45																980					10								0.5
14	1	6		23.5549						1		7.8											62					94					9.1								3.6	2.4
14	1	6		14.9606											1								59					350																				9
14	1	6		26.4197						22													6					1944													1.6	41.4
14	1	6		40.4254								14											345					1600													7.2	1.8
14	1	6		42.6535								9.8																20													28	7
14	1	6		19.4169								5											12					60
13	1	3		43.6085									24				88.35		15				32					1650		30											46.7	3.3
13	1	3		48.0648	43.5								6															122.5		8			16.5								44	7
13	1	3		36.9239	21.6							13																411														1
13	1	3		32.7859																								830
13	1	3		28.9662																			14					811.2													23
13	1	3		26.738								106.15																840																		22
12	1	8		44.2451								598.2											3							2																2
12	1	8		28.9662								284.4											3					80													190.298	33.582
12	1	8		26.4197								16	2										6					52													50							4
12	1	8		18.7803																			100										0.5																2
12	1	8		18.1437								5.6											45					14					0.5								2
12	1	8		32.4676								27.2																330	0.5				93								1	2
9	1	27		59.8423								419.55											198					62																			12.6	5.4
9	1	27		34.3775								629.5																		99.6											24	12
9	1	27		22.2817	364.32							303.5																					0.5								1.2	4.8
9	1	27		28.3296	120							499.2																52					1								24	4
9	1	27		17.1887	7																																				5.6	2.4
9	1	27		71.6197	136.4					6	69.7	280.5					682.75						12					32	204.6	136.4					82							0.5				836
9	1	27		15.2789	0.8																		2										36								23	0.5						2
9	1	27		63.662								834.2								5			19					132					5			1													7
8	1	2		56.3408								21																600													3
8	1	2		46.7916	5.6					44.8		56.7																64													3	20
8	1	2		14.0056	5.28							98.88					1						3										0.5
8	1	2		23.5549								5																322
8	1	2		31.831						6		107.2					2						2					216		17.5
8	1	2		40.4254	4.5												0.5						1					80														3				2
10	1	30		61.4338						47.15	14.7	75	5.5						202				9					64		134.1			4													15		0.5
10	1	30		48.3831						1.2		1035.6					25.2						300					88					2									69.5				6
10	1	30		21.3268	6.375							168.2					104											1050													6	15
10	1	30		32.1493	24							355.7	266				24.9																								1	31
10	1	30		13.6873																			6																		0.6	1.4
10	1	30		23.8732																		83.4	55.6										1									2							8
10	1	30		35.6507							27.4	0.9	7				7.2						1					1594					2			4					0.25	2.25
10	1	30		41.062								5					36			3			19					632
10	1	30		62.0704		198				1154.16		930.66					244		2				45					352.4		6												2						5
10	1	30		54.431																	6		110					1650		48												2
1	1	5		37.8789								148																													3					112
1	1	5		22.2817								191.6																													12.84	9.06
1	1	5		28.9662					2.6			104.4											12					194					23.4															72
1	1	5		12.4141
1	1	5		33.4225						74.56		173.76											9		13			365					7															1
1	1	5		19.4169	5.4																		12																			1						15
105	2		110	67.1634								273	7				320						6.6					1032					37			18						3	15.4
105	2		110	47.4282	8					13		26					28						1					3220.6		10.4			18									4				22
105	2		110	45.8366	1					309.4		334.29	18				360.7						10										1									26				100
105	2		110	21.9634								55																450														17
105	2		110	16.8704						28													96					640														3
105	2		110	27.693																			174																			32	38
105	2		110	19.0986								248.39											309					220													1.2	2.8
106	2		120	26.4197								81											53					235
106	2		120	26.1014													0.5						8										31.8													1			12
106	2		120	31.5127																			400.2					500																					236.32
106	2		120	32.4676					0.5	3.6							36						13					618														0.5						10	40
102	2		107	50.6113								3				6682.5																									2	1
102	2		107	37.8789						6							616		493.2									416.4					7								0.5	0.5				25
102	2		107	18.462								33.6					6.5											6		6.5											69.3	29.7				28.8
102	2		107	13.369						8.4							334.6															36										0.5				8
102	2		107	47.4282	122.4												489.6											2177.5																		258
102	2		107	52.8394	171.6							10								6.4			9.6					110					19													928.8
102	2		107	27.693	10					3.2		21.6								3			129.5					82.8
106	2		120	40.7437																			25					858														1
106	2		120	37.5606								8					25.6						16					20									2					1.5	24			530		1
106	2		120	27.0563						462											6		35.6					8		168			5									2	26.4
102	2		107	57.2958						9		947											27.2																				6.8			160
101	2		95	20.3718																								170.1					13													57.5
101	2		95	10.8225													980						2					216
101	2		95	32.1493		34.7				359.9	145.6	485.8					141.5																								297	8
101	2		95	22.2817							182.4												3																			8				2058
101	2		95	30.8761						1945		1											4					6					4								4	13				620
101	2		95	15.9155						331.5		12					0.5						2										8													22		38
107	2		90	35.3324	21.6					21.4		3175.9																													0.5
107	2		90	24.8282	644							80					0.5						0.5					6					7													1		16
107	2		90	29.9211	236.4					96		672					282.6											40					2									2				1185.6
107	2		90	32.4676								943.5											96					572		1360										2.85	16.15					1600
107	2		90	16.5521								84																					8								4	7				2
107	2		90	15.5972						0.5		975																		7			7													1
107	2		90	34.3775								1864.5																4		0.5											0.5	2
107	2		90	22.9183								1565.46																					24									2				3
107	2		90	35.969						10.85	21.7						1950.15											1					7									1
107	2		90	34.3775	22							49.2																4					24
111	2		87	38.1972	9					483.5																		3350											6	0.5		12				182
111	2		87	43.2901						9		34					351.5						8					1152														32				110
111	2		87	38.5155								442.8											11					3080		1												3				12
114	2		150	37.8789						92		237.5											105	10				824	712				0.5				319.6	61	60										2
114	2		150	48.7014						2047.32							92.4						468					990								73.5												8.1
114	2		150	44.8817						5.5		192					77						45	120				130		39.1	39.9														30			27.5
114	2		150	42.0169								107.7											192	3030				1500					4			119.5									343			6
114	2		150	65.2535	14						322.8	2330					14						11					1275.8											42			5				18
114	2		150	61.7521						583		1166											33	583				2746		75															2307	416		180
111	2		87	17.8254	4.9					19.6	5																	935		198				6								2
111	2		87	13.0507						5.6											0.5		6					648					12
111	2		87	23.5549			0.5	1.4		1.2225											1		12					1540		8.5575			0.5			0.5						0.5	3
111	2		87	40.4254	18							11.7											4.8					1484		6.7			3									1	3.2			1486
111	2		87	26.738						19		4.8											25										21									1						83.8
111	2		87	24.1916						143.05		33		150.55									3					1092													439.2	64
112	2		120	16.2338																			6					720
112	2		120	19.4169				9		0.5		25																1600													285.2
112	2		120	29.6028						1263		867											78					110													968	1.2
112	2		120	22.6						76.5		20											22					850													274
112	2		120	42.6535						8		245.1																1338													256	5
113	2		113	32.7859	0.5							10.8					547.2						2					2375													7.2	1.8
113	2		113	44.2451						1377	81	4.8																30													10.8	9.2		740	0.5
113	2		113	28.6479						1465.85		310.64					309.65						2																			0.5
113	2		113	15.2789						129.3	9.9	47.1											8					580													7.2	18.8
113	2		113	14.0056																			31					364					1
113	2		113	22.2817																			48					790													21	7
108	2		149	31.5127						897.6											3							407		51.2										0.5		1.5
108	2		149	25.4648						298.8													1					93														2
108	2		149	27.3747								317.2											13					910					1									4							1
108	2		149	45.8366						275.2		4.8								4			79.4					963					1									1				177.6			15
108	2		149	46.7916						1533.1		5					730.87						10					954																				3
108	2		149	34.0592	1.6				48														560					160					0.5									2				4.8	49	0.8	0.8
108	2		149	51.8845						387.6		1162.8																56		28.8			40									6						9.25
104	2		96	39.4704			95					223.2	8															1860					3									9						20
104	2		96	36.9239						116		13					41											54				27	5									2.5
104	2		96	24.1916						2.2	8.8	11											15					1050														5
104	2		96	27.3747																47.04			70.56					373				6	6													151	16
104	2		96	15.5972						0.5		7					15						7					625					2									9.5
104	2		96	18.7803	18					77							2						89					1067.5
110	2		175	49.338						6		931											270.8					1755					2						8			4
110	2		175	46.1549	91.8				8											307.2	27		58.8					56		0.5						3						0.5				240			4
110	2		175	55.3859	331.45																		203.2					2600		38			3			51										888			36.6
110	2		175	33.7408					0.5	174		8.2											96					956		529.6						2.7		27							10			75
110	2		175	73.8479	59.4					216		28.9								6	6		1848	95.9				3		7.2	0.5		3													191			3
110	2		175	64.6169						787.68		280											960					250		115.5			0.5									3				33
110	2		175	60.4789						1937.6	4.48	121.8								4			36					904		356																14			0.5
109	2		127	20.3718																2	1		37					912					16															19.1	1.6
109	2		127	17.8254																	4		29			314.1		264					1																7
109	2		127	33.7408						32.7		16.6											4					2020					6									0.5
109	2		127	26.1014								195.6								7.5			26.5					108					21															0.5	5
109	2		127	19.0986						2.8		5.6									2.4		1.6					1184					1									0.5							3.8
109	2		127	22.6								649.2	0.5																				15									2				25
109	2		127	15.9155								1371.5											5																									7
109	2		127	14.6423							44	2																1120
103	2		106	41.3803								523																3775				56	1								9	1
103	2		106	16.5521								289.8											15					600													2	2
103	2		106	49.0197	320.5							2004.1																25														2
103	2		106	18.462								382											55					1410
103	2		106	23.2366								52.4					5.8					75						795
103	2		106	25.4648	15																									26			5									6	1			490			84
103	2		106	32.7859								35											12					3798														6				714
103	2		106	35.6507						168	1008						655.32						16					6														17
103	2		106	14.0056																			140																			1
103	2		106	16.5521								5.4											0.5					420					3								156	1				104
[truncated: 15 more columns]
